# Supplementary material for: Efficacy of a Low-FODMAP Diet for Coeliac Patients with Persistent IBS-like Symptoms despite a Gluten-Free Diet: A Systematic Review
Source: MDPI journal article supplement (doi:10.3390/nu16071094), 2024-04-08
Supplement: s1 [file s1]

## **Literature search details**

PubMed and Embase were searched from database inception to 20-Jan-2023 for papers reporting on the efficacy of a low-FODMAP diet as a treatment in patients with coeliac disease. The search was subsequently repeated and updated on 16-Jan-2024. No language restrictions were used in the search. The exact search strings used for PubMed and Embase are as follows.

PubMed: (celiac disease[mesh] OR coeliac disease OR celiac disease) AND (diets, FODMAP[mesh] OR fodmap)

Embase: ('coeliac disease'/exp OR 'coeliac disease' OR 'celiac disease'/exp OR 'celiac disease') AND ('FODMAP diet' OR 'fodmap')

**Supplementary Table S1.** Papers excluded after full-text review.

| Paper                                                                                                                                                                                                                                                                                      | Reason for exclusion                                                                                                                                                            |
|--------------------------------------------------------------------------------------------------------------------------------------------------------------------------------------------------------------------------------------------------------------------------------------------|---------------------------------------------------------------------------------------------------------------------------------------------------------------------------------|
| Muir JG, Varney JE, Ajamian M, et al. <i>Gluten-free and low-FODMAP sourdoughs for patients with coeliac disease and irritable bowel syndrome: A clinical perspective. Int J Food Microbiol</i> 2019;290:237-246. doi: 10.1016/j.ijfoodmicro.2018.10.016.                                  | Article is a review                                                                                                                                                             |
| Yoosuf S, Makharia GK. <i>Evolving Therapy for Celiac Disease. Front Pediatr</i> 2019;7:193. doi: 10.3389/fped.2019.00193.                                                                                                                                                                 | Article is a review                                                                                                                                                             |
| Reddel S, Putignani L, Del Chierico F. <i>The Impact of Low-FODMAPs, Gluten-Free, and Ketogenic Diets on Gut Microbiota Modulation in Pathological Conditions. Nutrients</i> 2019;11:373. doi: 10.3390/nu11020373.                                                                         | Article is a review                                                                                                                                                             |
| Bascuñán KA, Elli L, Pellegrini N, et al. <i>Impact of FODMAP Content Restrictions on the Quality of Diet for Patients with Celiac Disease on a Gluten-Free Diet. Nutrients</i> 2019;11:2220. doi: 10.3390/nu11092220.                                                                     | Article discusses effect of a low-FODMAP GFD on nutritional adequacy but not on persistent symptoms and therefore did not meet inclusion criteria                               |
| Patel PK, Tanpowpong P, Sriaroon P, et al. <i>Nonallergic Diseases Associated With Foods. J Allergy Clin Immunol Pract</i> 2023:S2213-2198(23)01058-9. doi: 10.1016/j.jaip.2023.09.027. Epub ahead of print.                                                                               | Article is a review                                                                                                                                                             |
| Herfindal AM, van Megen F, Gilde MKO, et al. <i>Effects of a low FODMAP diet on gut microbiota in individuals with treated coeliac disease having persistent gastrointestinal symptoms - a randomised controlled trial. Br J Nutr.</i> 2023;130:2061-2075. doi: 10.1017/S0007114523001253. | Article discusses effects of a low-FODMAP GFD on gut microbiota but does not investigate clinical efficacy on persistent symptoms and therefore did not meet inclusion criteria |

GFD: gluten-free diet; FODMAP: fermentable oligo-, di-, monosaccharides and polyols

**Supplementary Table S2.** Risk of bias assessment

| Paper                                   | Domain-specific risk of bias assessment    |                                                                                    |                                                                                  |                                                    |                                   |                                             |                                          | Overall risk of bias judgement |
|-----------------------------------------|--------------------------------------------|------------------------------------------------------------------------------------|----------------------------------------------------------------------------------|----------------------------------------------------|-----------------------------------|---------------------------------------------|------------------------------------------|--------------------------------|
| Randomised controlled trials*           |                                            |                                                                                    |                                                                                  |                                                    |                                   |                                             |                                          |                                |
|                                         | ROB arising from the randomization process | ROB due to deviations from the intended interventions (assignment to intervention) | ROB due to deviations from the intended interventions (adhering to intervention) | ROB due to missing outcome data                    | ROB in measurement of the outcome | ROB due to selection of the reported result |                                          | Overall risk of bias judgement |
| van Megen et al. 2022[25]               | Low risk                                   | High risk                                                                          | High risk                                                                        | Some concerns                                      | Some concerns                     | Low risk                                    |                                          | High risk                      |
| Roncoroni et al. 2018 [26]              | Low-risk                                   | High risk                                                                          | High risk                                                                        | Some concerns                                      | Low risk                          | Low risk                                    |                                          | High risk                      |
| Non-randomised interventional studies** |                                            |                                                                                    |                                                                                  |                                                    |                                   |                                             |                                          |                                |
|                                         | Bias due to confounding                    | Bias in selection of participants into the study                                   | Bias in classification of interventions                                          | Bias due to deviations from intended interventions | Bias due to missing data          | Bias in measurement of outcomes             | Bias in selection of the reported result | Overall risk of bias judgement |
| Testa et al. 2018 [27]                  | Critical risk                              | Low risk                                                                           | Low risk                                                                         | Moderate risk                                      | Serious risk                      | Serious risk                                | Moderate risk                            | Critical risk                  |
| Trott et al. 2021 [28]                  | Critical risk                              | Serious risk                                                                       | Low risk                                                                         | Moderate risk                                      | Low risk                          | Serious risk                                | Moderate risk                            | Critical risk                  |
| Observational studies***                |                                            |                                                                                    |                                                                                  |                                                    |                                   |                                             |                                          |                                |
|                                         | Selection score                            |                                                                                    | Comparability score                                                              |                                                    | Outcome score                     |                                             | Overall risk of bias judgement           |                                |
| Cyrkot et al. 2021 [30]                 | 2/3 points                                 |                                                                                    | 1/2 points                                                                       |                                                    | 3/3 points                        |                                             | Medium risk of bias (total 6/8 points)   |                                |
| Roncoroni et al. 2018 [29]              | 3/4 points                                 |                                                                                    | 0/2 points                                                                       |                                                    | 2/3 points                        |                                             | High risk of bias (total 5/9 points)     |                                |

\* Risk of bias evaluated using the Cochrane RoB 2.0 tool

*\*\* Risk of bias evaluated using the ROBINS-I tool*

*\*\*\* Risk of bias evaluated using the Newcastle-Ottawa Quality Assessment scales for cross-sectional and cohort studies*
